# Supplementary material
Source: PubMed Central journal article supplement (PMC4651151)
Supplement: gf572sup_10-1055-s-0032-1328084.pdf [file gf572sup_10-1055-s-0032-1328084.pdf]

# Fortschritte beim Mammakarzinom – ein Rückblick auf das Jahr

## Advances in Breast Cancer – Looking Back over the Year

**Autoren** D. Lüftner<sup>1</sup>, M. P. Lux<sup>2</sup>, N. Maass<sup>3</sup>, F. Schütz<sup>4</sup>, I. Schwidde<sup>5</sup>, P. A. Fasching<sup>6</sup>, T. Fehm<sup>7</sup>, W. Janni<sup>8</sup>, S. Kümmel<sup>5</sup>, H.-C. Kolberg<sup>9</sup>

**Institute**

- <sup>1</sup> Medizinische Klinik und Poliklinik II, Campus Charité Mitte, Berlin
- <sup>2</sup> Frauenklinik, Universitätsklinikum Erlangen, Erlangen
- <sup>3</sup> Department of Gynecology and Obstetrics, University Hospital Aachen
- <sup>4</sup> Frauenklinik, Universitätsklinikum Heidelberg, Heidelberg
- <sup>5</sup> Klinik für Senologie/Brustzentrum, Klinikum Essen-Mitte, Essen
- <sup>6</sup> Department of Gynecology and Obstetrics, University Hospital Erlangen, Erlangen
- <sup>7</sup> Department of Obstetrics and Gynecology, University Tübingen, Tübingen
- <sup>8</sup> Frauenklinik, Klinikum der Universität Ulm, Ulm
- <sup>9</sup> Klinik für Gynäkologie und Geburtshilfe, Marienhospital Bottrop, Bottrop

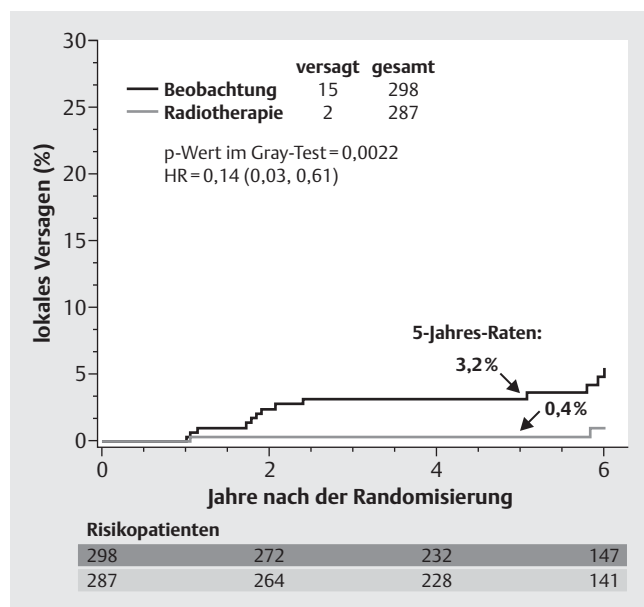

**Abb. 1** Lokalrezidivfreies Überleben in der RTOG 9804-Studie (in Anlehnung an [12]). (HR: Hazard Ratio).

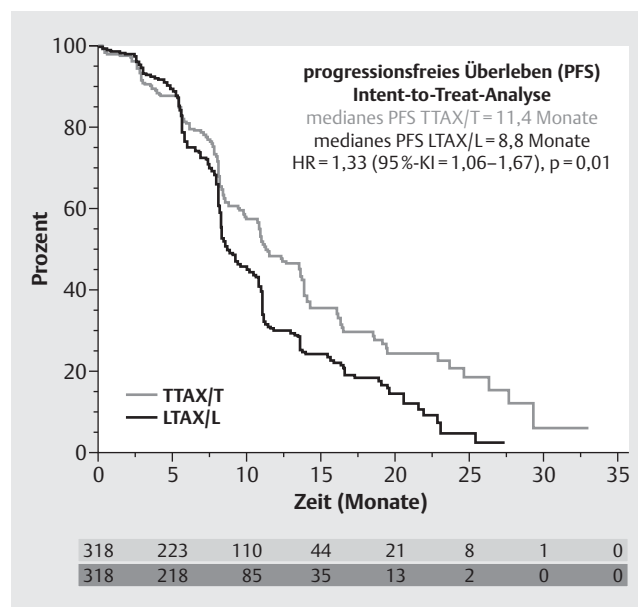

**Abb. 2** Progressionsfreies Überleben in der MA.31-Studie (in Anlehnung an [13]) (TTAX/T: Taxanbehandlung mit Trastuzumab, LTAX/L: Taxanbehandlung mit Lapatinib, HR: Hazard Ratio).

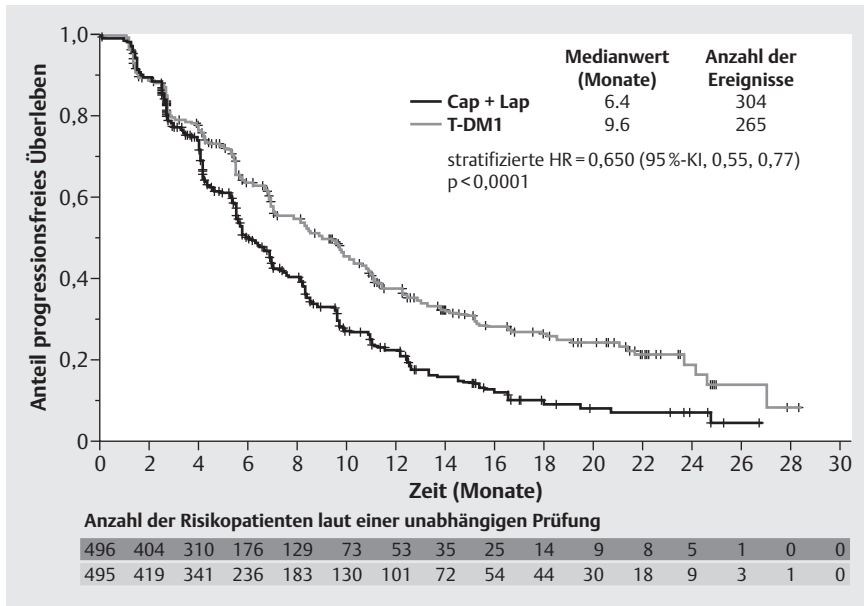

**Abb. 3** Erste Resultate zum progressionsfreien Überleben in der EMILIA-Studie (in Anlehnung an [14]) (T-DM1: Trastuzumab-Maytansin, Cap: Capecitabin, Lap: Lapatinib, HR: Hazard Ratio).

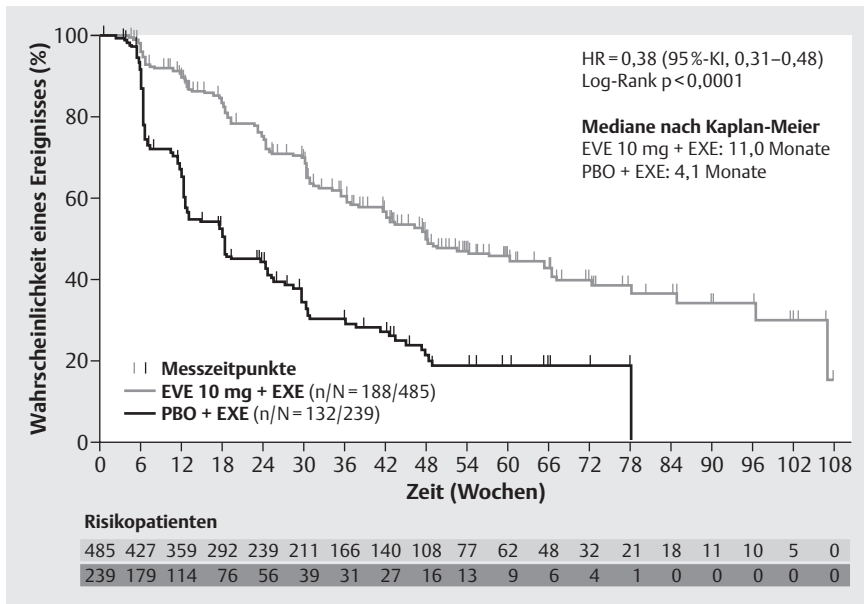

**Abb. 4** Progressionsfreie Überlebenswahrscheinlichkeit in der BOLERO-2-Studie (in Anlehnung an [24]) (HR: Hazard Ratio, KI: Konfidenzintervall, EVE: Everolimus, EXE: Exemestan, PBO: Placebo).

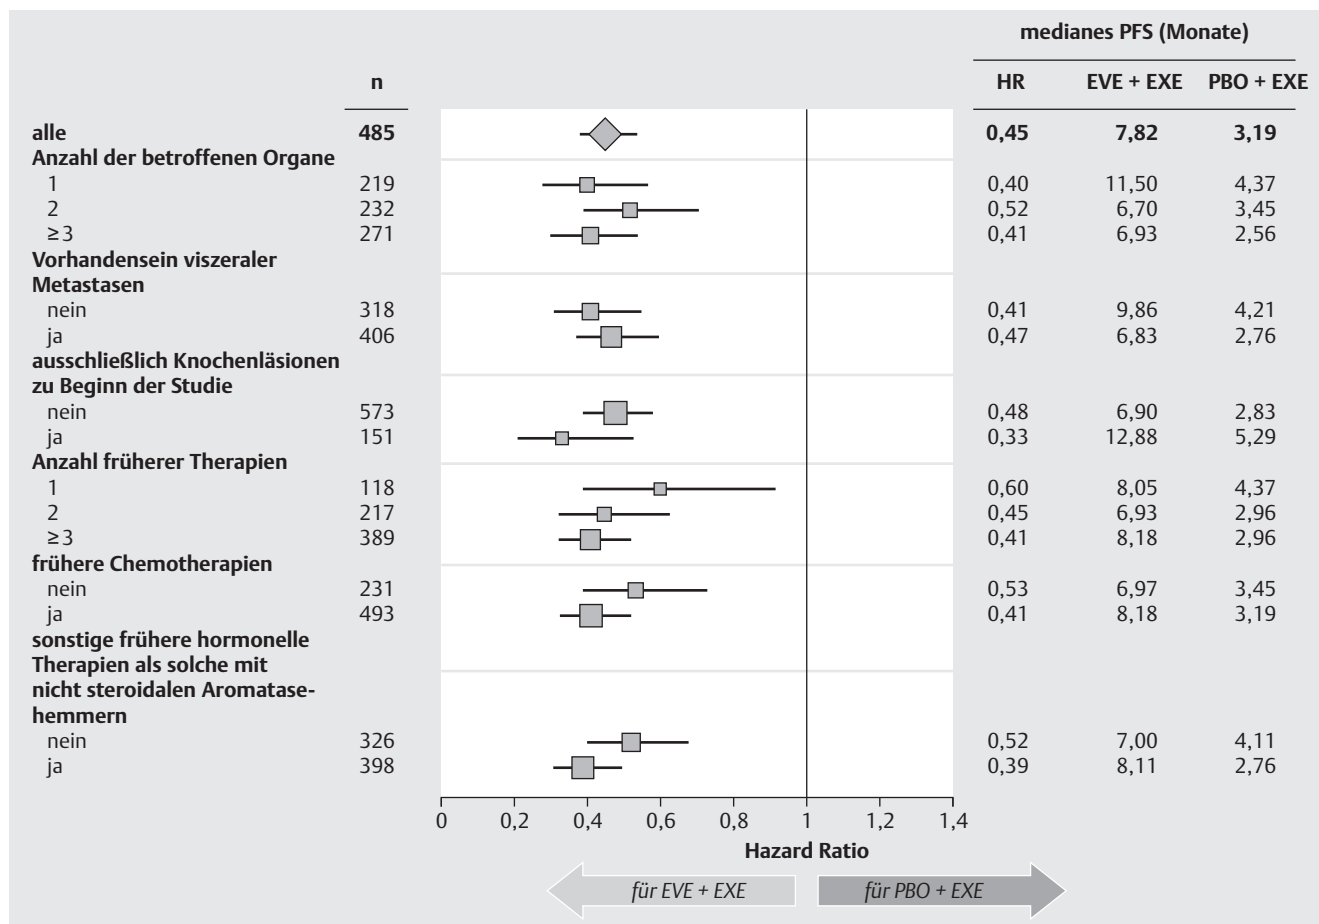

**Abb. 5** Subgruppenanalyse für den Vergleich des progressionsfreien Überlebens in der BOLERO-2-Studie (in Anlehnung an [24]) (HR: Hazard Ratio, EVE: Everolimus, EXE: Exemestan, PBO: Placebo, PFS: Progression free survival).

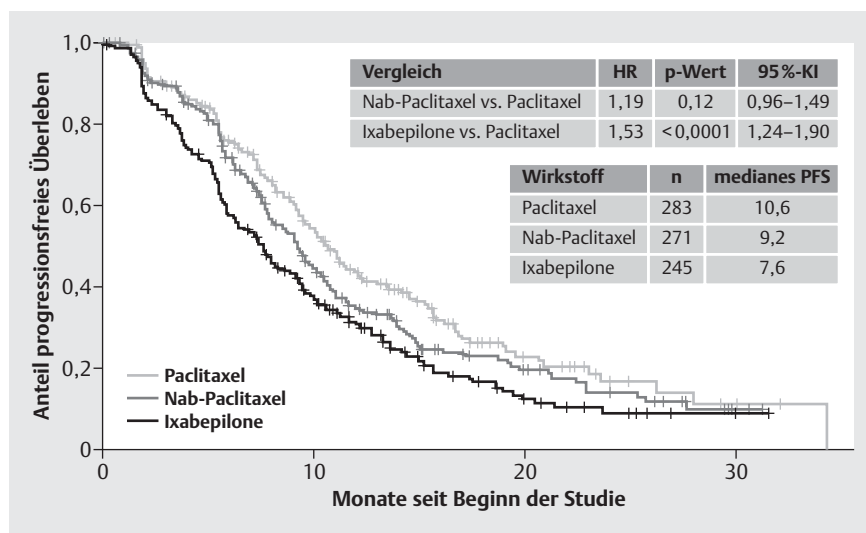

**Abb. 6** Progressionsfreies Überleben unter Nab-Paclitaxel oder Ixabepilone im Vergleich zu Paclitaxel (in Anlehnung an [33]) (HR: Hazard Ratio, PFS: Progression free survival).
